# Supplementary material
Source: MDPI journal article supplement (https://www.mdpi.com/2071-1050/12/22/9315)
Supplement: s1 [file s1]

**Additional work on CFD model establishment and grid independence analysis** for the paper titled “Simulation study on dynamic thermal performance of a new ventilated roof with [form-stable](https://www.sciencedirect.com/science/article/pii/S030626191300891X) PCM in southern China”

1. **Establishment of the simulation model**

The ANSYS FLUENT was used to simulate the VRFP system. In order to study the heat transfer process, solidification and melting model, standard k-ε turbulence model, DTRM radiation model and energy equation were opened. The under-relaxation factor was set to 0.9 for better convergence stability. Correlation algorithm of velocity and pressure was set to the SIMPLE scheme. The material properties of each layer were set as the input data of the model. The ICEM CFD program was used to mesh the model. [Hexagonal](javascript:;) structure grid was used in the roof construction and O-block grid was used in the ventilated cavity. A local mesh refinement is adopted around the cavity. The mesh generation is shown in Fig. 1. The boundary conditions are shown in Fig. 2. The external and inner surfaces adopted the third type of boundary conditions, and the adiabatic boundary condition was set on the left and right sides of the model. Considering the computational efficiency of the model, time step was set to 60 min and the number of steps was set to 168.

| 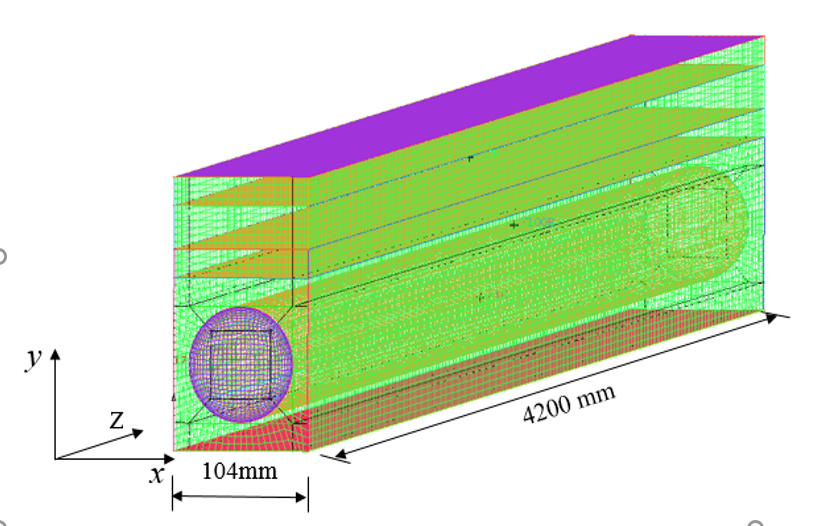 | **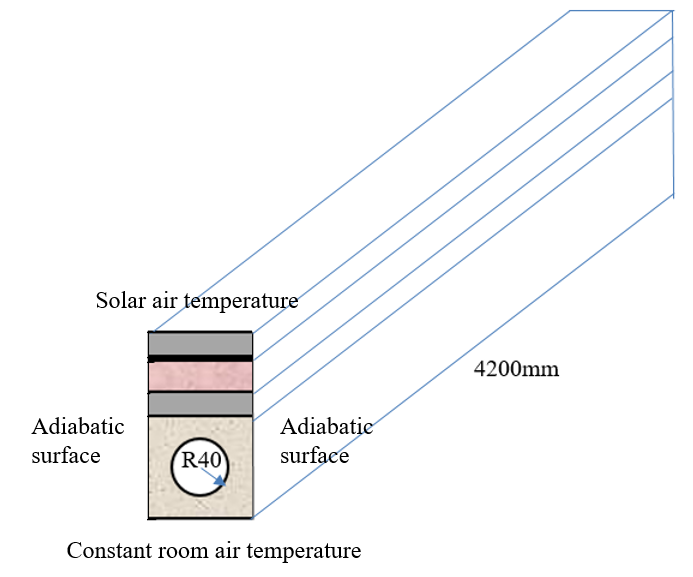** |
| --- | --- |
| **Fig. 1.** Mesh generation of VRFP unit (250 thousands cells) | **Fig. 2.** The boundary conditions of VRFP unit |

1. **Grid independence analysis.**

Too many mesh cell numbers will increase the calculation time and the burden on the computer, and too few mesh cell numbers will affect the accuracy of the calculation results. Three cell numbers (20000 cells, 250000 cells and 640000 cells) were selected to calculate the inner surface temperatures of the roof in the FLUENT model, and the results were shown in Fig.3. It can be seen from the figure that the calculation result of 250,000 cells is basically the same as the calculation result of 640,000 cells. And the calculation result of 20,000 cells has a relatively large deviation. So a grid of 250,000 cells was used to simulate the thermal performance of VRFP to ensure the efficiency and accuracy of calculation. The mesh volume ranges from 32.5 mm3 to 740.3 mm3. The quality of the grid ranges from 0.6 to 1, indicating a good mesh quality.


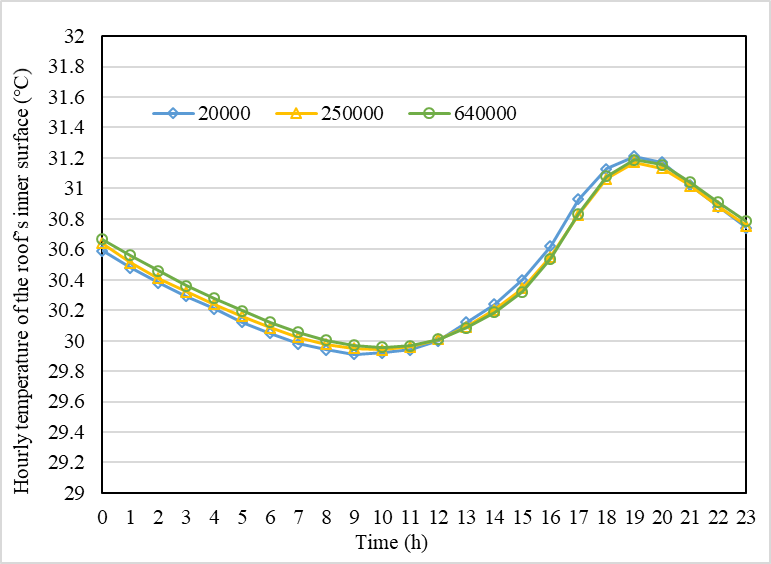


**Fig. 3.** The comparison of results under different grid numbers
